# Supplementary material for: Photo-induced micellization of block copolymers bearing 4,5-dimethoxy-2-nitrobenzyl side groups
Source: Royal Society of Chemistry journal article supplement (doi:10.1039/c1sm05631j), 2011-01-01
Supplement: c1sm05631j.pdf [file c1sm05631j.pdf]

## Supplementary Information

# Photoinduced micellization of block copolymers bearing 4,5-dimethoxy-2-nitrobenzyl side groups

Olivier Bertrand,<sup>a§</sup> Jean-Marc Schumers,<sup>a§</sup>  
Chandrasekar Kuppan,<sup>a</sup> Jacqueline Marchand-  
Brynaert,<sup>b</sup> Charles-André Fustin<sup>a\*</sup> and Jean-  
François Gohy<sup>a\*</sup>

## Experimental

### Materials and methods

Styrene (Aldrich, 99 %) and tert-butyl acrylate (tBA, Acros, 99 %) were passed through activated basic alumina (Acros) columns prior to use. Copper bromide (CuBr, Aldrich, 99.999 %), ethyl 2-bromoisobutyrate (EBiB, Acros, 98 %), anisole (Acros, 99 %), N,N,N',N'',N'''-pentamethyldiethylenetriamine (PMDETA, Aldrich, 98%), ethylenediaminetetraacetic acid disodium salt dehydrate (EDTA, Fluka, 97 %), trifluoroacetic acid (TFA, Acros, 99 %) and all the other chemicals were used as received.

### Typical procedure for the synthesis of PtBA (PtBA<sub>31</sub>, Entry 1, Table 1).

Under argon, a round-bottom flask, with a stopcock, containing CuBr (82 mg; 0.57 mmol; 1 equiv.) was filled with a solution containing tert-butyl acrylate (tBA; 9.97 mL; 68.68 mmol; 120 equiv.), EBiB (112 mg; 0.57 mmol, 1 equiv.), PMDETA (109 mg; 0.62 mmol; 1.1 equiv.), and anisole (5.90 mL; 40 wt-%) previously degassed by three freeze-pump-thaw cycles. The mixture was degassed by three freeze-pump-thaw cycles, filled with argon and stirred in an oil bath at 90°C for 30 min (tBA conversion = 26 %). The polymerization was quenched by quickly cooling the tube in a water-ice bath. The reaction mixture was diluted with CH<sub>2</sub>Cl<sub>2</sub> and washed with an aqueous solution of EDTA (0.04 M). The organic phase was dried over MgSO<sub>4</sub>, filtered and the solvent was removed under reduced pressure. The residue was precipitated in MeOH:H<sub>2</sub>O 50:50, filtered and dried in vacuo at 30°C for 24 h, affording a white solid (1.67 g, 70%).

$M_n$  (SEC) = 7,100 g/mol; PDI (SEC) = 1.22. <sup>1</sup>H NMR (300 MHz, CDCl<sub>3</sub>): δ 4.1 (m, 3H, CH<sub>2</sub>-O, CH-Br), 2.3- 2.0 (b, 73 H, CH backbone), 1.9-1.3 (s, 814H, CH<sub>2</sub> backbone, CH<sub>3</sub> t-Butyl).  $M_n$  (NMR) = 4,000 g/mol.

### Typical procedure for the synthesis of PtBA-*b*-PS (PtBA<sub>31</sub>-*b*-PS<sub>158</sub>, Entry 2, Table 2).

Under argon, a round bottom flask, with a stopcock, containing CuBr (12 mg; 0.08 mmol; 1 equiv.) was filled with a solution containing PtBA<sub>31</sub>-Br (332 mg; 0.08 mmol, 1 equiv.), styrene (2.61 g; 25.10 mmol; 300 equiv.), PMDETA

(16 mg; 0.09 mmol; 1.1 equiv.) and anisole (784 mg; 30 wt-%) previously degassed by three freeze-pump-thaw cycles.

The mixture was degassed by three freeze-pump-thaw cycles, filled with argon and stirred in an oil bath at 100°C for 4 h (styrene conversion = 37 %). The polymerization was quenched by quickly cooling the tube in a water-ice bath. The reaction mixture was diluted with CH<sub>2</sub>Cl<sub>2</sub> and washed with an aqueous solution of EDTA (0.04 M). The organic phase was dried over MgSO<sub>4</sub>, filtered and the solvent was removed under reduced pressure. The residue was precipitated in hexane, filtered and dried in vacuo at 30°C for 24 h, affording a white powder (1.04 g, 81 %).

$M_n$  (SEC) = 21,000 g/mol; PDI (SEC) = 1.14. <sup>1</sup>H NMR (500 MHz, CDCl<sub>3</sub>): δ 7.30-6.30 (b, 250H, HAr; PS), 4.1 (m, 2H, CH<sub>2</sub>-O; Chain end), 2.3- 1.1 (b, 1038H, CH backbone, CH<sub>2</sub> backbone, CH<sub>3</sub> t-Butyl).  $M_n$  (NMR) = 21,500 g/mol.

### Typical procedure for the hydrolysis of PtBA-polymers with TFA/CH<sub>2</sub>Cl<sub>2</sub> (PAA<sub>31</sub>-*b*-PS<sub>168</sub>, Entry 2, Table 3).

In a round bottom flask, PtBA<sub>31</sub>-*b*-PS<sub>168</sub> (974 mg; 1.40 mmol in tBA units; 1 equiv.) was dissolved in dichloromethane (97.4 mL, 0.01 M). TFA (1.46 mL, 19.72 mmol, 14 equiv.) was added and the solution was stirred at 20°C for 24 h. The solvent was removed under reduced pressure and the residue was kept in a minimum amount of DMF and dialyzed against methanol. The polymer was precipitated in hexane, filtered and dried in vacuo at 30°C for 24 h, affording a white powder (813 mg, 91%).

<sup>1</sup>H NMR (300 MHz, DMF-d<sub>7</sub>): δ 7.3-6.1 (b, 250H, HAr; PS), 2.2 (b, 74H, CH backbone PAA), 2.1- 1.1 (b, 300H, CH<sub>2</sub> backbone PAA + PS).  $M_n$  (NMR) = 19,700 g/mol.

### Typical procedure for the photocleavage in solution (UV-Vis)

A solution of PDMNBA<sub>43</sub>-*b*-PS<sub>49</sub> in CHCl<sub>3</sub> (C= 20 mg/L) was irradiated under stirring at 350 nm. The photocleavage was followed by UV-visible spectroscopy until no change was observed in the shape of the spectrograms (t(min)= 0, 5, 10, 15, 20, 25, 30, 40, 45).

### Typical procedure for determination of the quenching effect of dimethoxynitrosobenzaldehyde

A solution of PDMNBA<sub>43</sub>-*b*-PS<sub>49</sub> (C= 0.1 g/L) in CHCl<sub>3</sub> stabilized with EtOH was irradiated at 350 nm. After 60 min irradiation time, coumarin 343 was added to the medium (C= 0.3 mg/L). The mixture was stirred for 15 min and analyzed by fluorescence spectroscopy.

### Typical procedure for encapsulation of the dye into the micellar core by direct dissolution

PAA<sub>43</sub>-*b*-PS<sub>49</sub> (C= 0.1 g/L) was added to a solution of coumarin 343 (C= 0.3 mg/L) in CHCl<sub>3</sub> stabilized with EtOH. The mixture was stirred and the encapsulation was followed by fluorescence spectroscopy (t (h)= 0, 1, 20).

### Typical procedure for diffusion of the dye into the micellar core

A quartz cell was filled with a solution of PAA<sub>43</sub>-*b*-PS<sub>49</sub> micelles (C= 0.1 g/L) and with Coumarin 343 (C= 0.3 mg/L) in CHCl<sub>3</sub> stabilized with EtOH. The solution was stirred and

the diffusion of the dye into the micellar core was followed by fluorescence spectroscopy ( $t$  (min) = 0, 10, 20, 30, 40, 50, 60).

Additional comments on the synthesis

As mention in the paper core, the photocleavable polymers are obtained by the grafting of the desired *o*-nitrobenzyl derivative onto PAA-*b*-PS precursors. The latter are synthesized in three steps: i) polymerization of *tert*-butyl acrylate by ATRP, ii) copolymerization of styrene by ATRP from the PtBA macroinitiator to obtain PtBA-*b*-PS copolymers, iii) hydrolysis of the *tert*-butyl esters of the PtBA block.

Table 1 presents the results obtained for the polymerization of *tert*-butyl acrylate (tBA) by ATRP. The polymerizations were conducted in anisole at 80°C or 90°C using CuBr/PMDETA as catalytic system in conjunction with EBiB as initiator.<sup>1</sup> Well-defined PtBA's with molar masses ranging from 4,000 to 19,000 g/mol ( $M_n$ , NMR) and with narrow molar mass distributions (PDI's < 1.25) were obtained.

Table 1: Experimental conditions and obtained results for the ATRP of PtBA.

| Entry <sup>a</sup> | PtBA <sup>b</sup>   | t <sup>c</sup><br>(h) | conv <sup>d</sup><br>(%) | $M_n$ (RMN) <sup>e</sup><br>(g/mol) | $M_n$ (SEC) <sup>f</sup><br>(g/mol) | PDI <sup>f</sup> |
|--------------------|---------------------|-----------------------|--------------------------|-------------------------------------|-------------------------------------|------------------|
| 1                  | PtBA <sub>31</sub>  | 0.5                   | 26                       | 4,000                               | 7,100                               | 1.22             |
| 2                  | PtBA <sub>43</sub>  | 1                     | 33                       | 5,700                               | 7,100                               | 1.20             |
| 3                  | PtBA <sub>112</sub> | 2.5                   | 76                       | 14,400                              | 16,000                              | 1.10             |

<sup>a</sup> Reaction conditions: [EBiB]/[CuBr]/[PMDETA] = 1/1/1.1, anisole 40 wt%, T = 90°C. <sup>b</sup> The numbers in subscript are the average degrees of polymerization determined by <sup>1</sup>H NMR. <sup>c</sup> t = reaction time. <sup>d</sup> conv = conversion of monomer. <sup>e</sup> Molar mass of the polymer determined by <sup>1</sup>H NMR. <sup>f</sup>  $M_n$  and PDIs were determined by SEC using a PS calibration.

The next step consisted in polymerizing styrene with the synthesized PtBA macroinitiators in order to yield PtBA-*b*-PS block copolymers. The reaction conditions and the results for those copolymerizations are shown in Table 2. Similar reaction conditions than those used for the polymerizations of tBA were investigated and several well-defined PtBA-*b*-PS's with molar masses ranging from 10,600 to 27,500 g/mol ( $M_n$ , NMR) and with PDI's lower than 1.25 were successfully synthesized.

After the synthesis of PtBA-*b*-PS copolymers, the hydrolysis of the *t*-butyl esters into carboxylic acid functions has been performed in acidic conditions. The polymers were

stirred in dichloromethane with trifluoroacetic acid as described in the literature.<sup>2</sup> The starting PtBA-*b*-PS and the corresponding PAA-*b*-PS obtained by hydrolysis are presented in Table 3.

Table 3: Hydrolysis of the *tert*-butyl side groups of the PtBA sequence.

| Entry <sup>a</sup> | PtBA- <i>b</i> -PS                                | PAA- <i>b</i> -PS                                | $e_h$ <sup>b</sup><br>(%) |
|--------------------|---------------------------------------------------|--------------------------------------------------|---------------------------|
| 1                  | PtBA <sub>43</sub> - <i>b</i> -PS <sub>49</sub>   | PAA <sub>43</sub> - <i>b</i> -PS <sub>49</sub>   | 96                        |
| 2                  | PtBA <sub>31</sub> - <i>b</i> -PS <sub>168</sub>  | PAA <sub>31</sub> - <i>b</i> -PS <sub>168</sub>  | 95                        |
| 3                  | PtBA <sub>112</sub> - <i>b</i> -PS <sub>125</sub> | PAA <sub>112</sub> - <i>b</i> -PS <sub>125</sub> | 95                        |

<sup>a</sup> Reaction conditions:  $C_{\text{polymer}}$  = 10 g/L, TFA = 10 eq. compared to tBA, 20°C, 48 h. <sup>b</sup>  $e_h$  = hydrolysis yield determined by <sup>1</sup>H NMR.

Notes and references

<sup>a</sup> Institute of Condensed Matter and Nanosciences (IMCN), Bio- and Soft matter (BSMA), Université catholique de Louvain, Place L. Pasteur 1, Louvain-la-Neuve, Belgium; E-mail: charles-andre.fustin@uclouvain.be, jean-francois.gohy@uclouvain.be  
<sup>b</sup> Institute of Condensed Matter and Nanosciences (IMCN), Molecules, Solids and Reactivity (MOST), Université catholique de Louvain, Place L. Pasteur 1, Louvain-la-Neuve, Belgium;  
§These authors contributed equally to the present work  
1 Q. G. Ma, K. L. Wooley, *J. Polym. Sci. A Polym. Chem.*, 2000, **38**, 4805.  
2 S. Strandman, A. Zarembo, A. A. Darinskii, P. Lauritnmaki, S. J. Butcher, E. Vuorimaa, H. Lemmetyinen, H. Tenhu, *Macromolecules*, 2008, **41**, 8855.
